# Supplementary material for: Chromosome-Level Assemblies for the Pine Pitch Canker Pathogen <em>Fusarium circinatum</em>
Source: Preprints.org preprint supplement (doi:10.20944/preprints202312.0214.v1), 2023-12-05
Supplement: Supplementary file 1 [file supplementary]

Archive with 5 entries (5 files):
- DeVos et al Figure S3.pdf
- DeVos et al Figure S4.pdf
- DeVos et al Figure S2.pdf
- DeVos et al Figure S1.pdf
- Supplemental Tables.xlsx
