# Supplementary material for: Chromosome-Level Assemblies for the Pine Pitch Canker Pathogen <em>Fusarium circinatum</em>
Source: Preprints.org preprint supplement (doi:10.20944/preprints202312.0214.v1), 2023-12-05
Supplement: Supplementary file 1 [file supplementary › DeVos et al Figure S1.pdf]

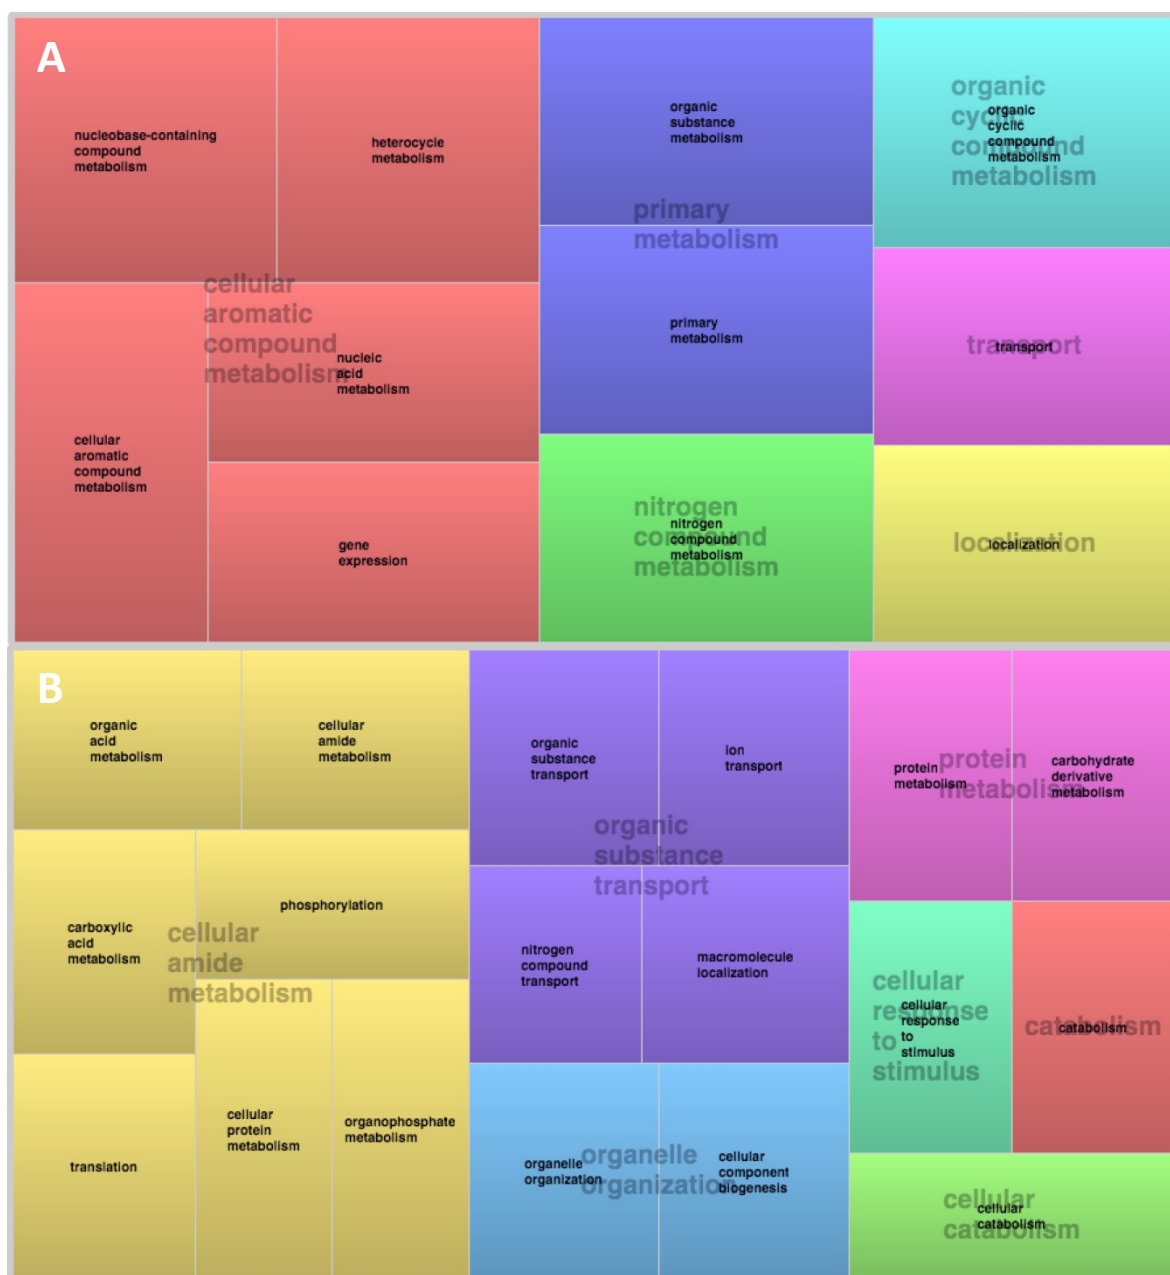

Supplemental Figure 1. REVIGO treemap summarizing GO biological process categories enriched in the accessory chromosome 12 of *F. circinatum* FSP34 (A) and KS17 (B). The enriched GO terms, together with their *P*-values, were subjected to the REVIGO web server to summarize GO terms.
