# Supplementary material for: Chromosome-Level Assemblies for the Pine Pitch Canker Pathogen <em>Fusarium circinatum</em>
Source: Preprints.org preprint supplement (doi:10.20944/preprints202312.0214.v1), 2023-12-05
Supplement: Supplementary file 1 [file supplementary › DeVos et al Figure S2.pdf]

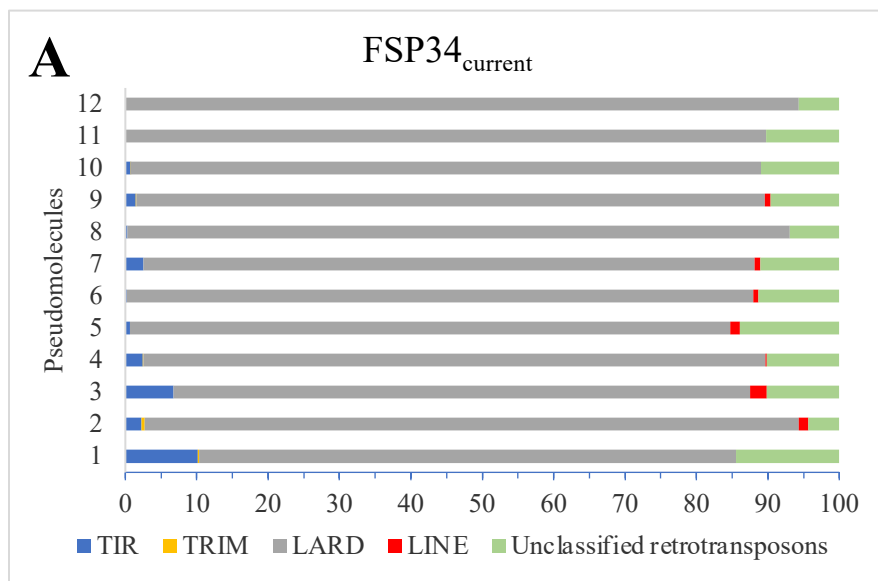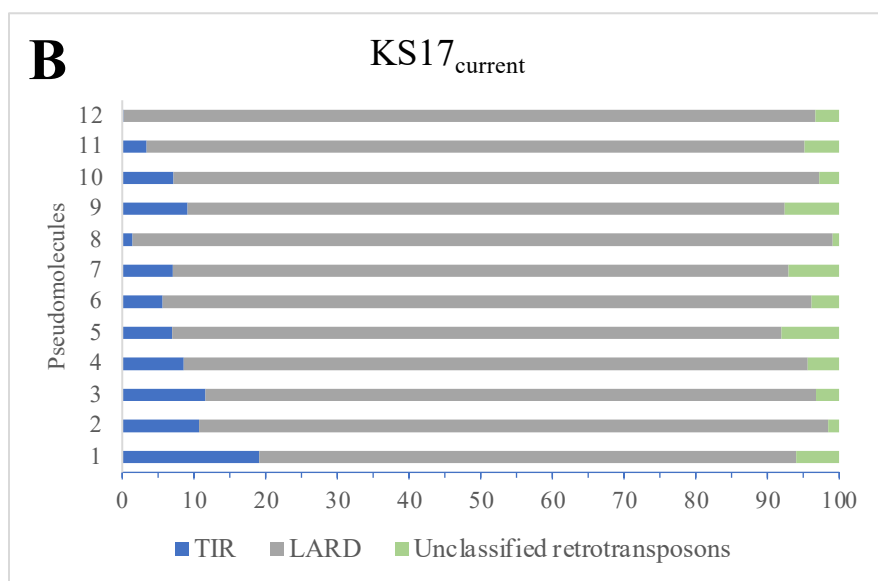

Supplemental Figure 2. Classes and orders of transposable elements (TEs) identified in FSP34<sub>current</sub> (A) and KS17<sub>current</sub> (B), based on the classification of (WICKER *et al.* 2007). The TEs are given as Class I (TRIM - Terminal Repeat transposons in Miniature, LARD - Large Retrotransposon derivatives, LINE - Long Interspersed Nuclear Elements and unclassified - non-autonomous retrotransposon), and Class II (TIR - Terminal Inverted Repeats).
