# Supplementary material for: Chromosome-Level Assemblies for the Pine Pitch Canker Pathogen <em>Fusarium circinatum</em>
Source: Preprints.org preprint supplement (doi:10.20944/preprints202312.0214.v1), 2023-12-05
Supplement: Supplementary file 1 [file supplementary › DeVos et al Figure S3.pdf]

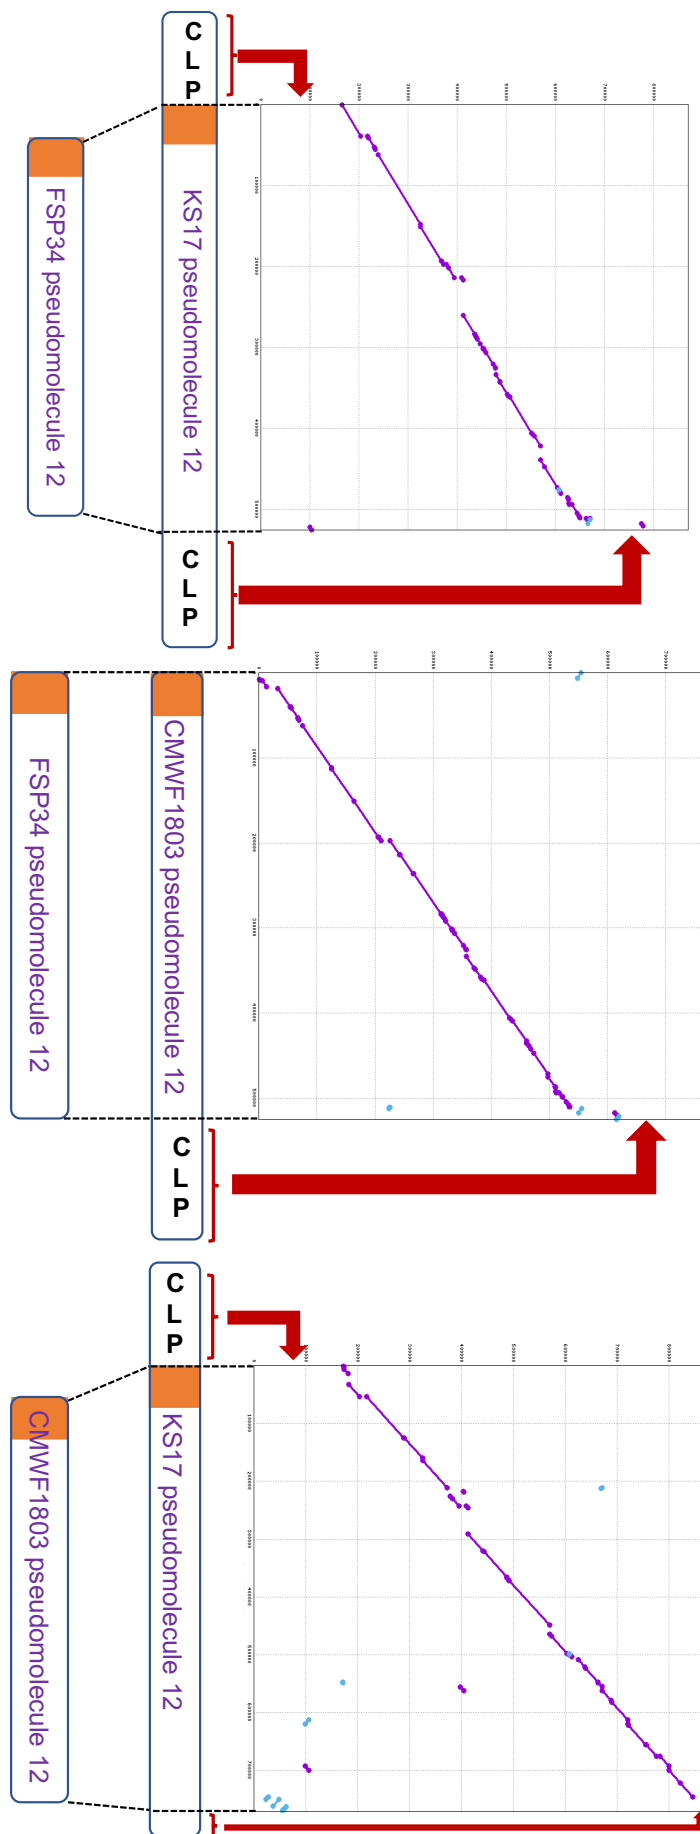

Figure S3. Sequence comparison of the chromosome length polymorphism (CLP) of chromosome 12. Genomic alignments of *F. circinatum* CMWF1803 chromosome 12 to the corresponding chromosome in FSP34 and KS17, revealed an intermediately sized chromosome 12 (771 083bp) [86] that had no distal portion (similar to FSP34). Only a partial portion of the proximal portion of KS17 that was absent in FSP34, was found. (A) Chromosome 12 comparison of *F. circinatum* FSP34 and KS17. (B) Chromosome 12 comparison of *F. circinatum* CMWF1803 and FSP34. (C) Chromosome 12 comparison of *F. circinatum* KS17 and CMWF1803. Forward matches are indicated with purple dots and reverse matches with blue dots. The orange blocks indicate the centromeric position.
