# Supplementary material for: Chromosome-Level Assemblies for the Pine Pitch Canker Pathogen <em>Fusarium circinatum</em>
Source: Preprints.org preprint supplement (doi:10.20944/preprints202312.0214.v1), 2023-12-05
Supplement: Supplementary file 1 [file supplementary › DeVos et al Figure S4.pdf]

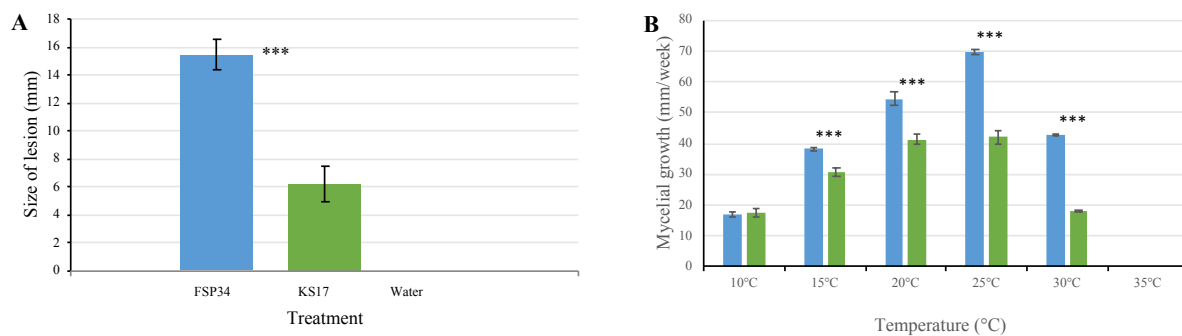

**Supplementary Figure S4.** Comparison of growth and pathogenicity of *F. circinatum* strains FSP34 and KS17. (A) Average lesion length induced by the respective strains on each of twenty *P. patula* seedlings 3 weeks after inoculation and the water control. No lesions developed on in the control treatment. (B) Average growth rate at a range of temperatures after 7 days of growth in the dark on  $\frac{1}{2}$  PDA. Error bars represent the standard deviation, significant differences based on Student's t-test are indicated with an asterisk (\*\* $P < 0.001$ ).
